# Supplementary material for: Maternal Preconception COVID-19 Vaccination and Its Protective Effect on Infants after a Breakthrough Infection during Pregnancy
Source: MDPI journal article supplement (doi:10.3390/vaccines12101132), 2024-10-03

**Supplementary Table S1.** The descriptive statistical results of anti-SARS-CoV-2 IgG in the participants.

| IgG (OD <sub>450</sub> ) | Vaccines before pregnancy +<br>Infection<br>(Group I, n=101) | Vaccines before<br>pregnancy + no infection<br>(Group II, n=20) | No vaccines + infection<br>(Group III, n=17) | Before SARS-CoV-2 (2019)<br>(Group IV, n=20) | Adults Infection<br>SARS-CoV-2<br>(Group V, n=20) |
|--------------------------|--------------------------------------------------------------|-----------------------------------------------------------------|----------------------------------------------|----------------------------------------------|---------------------------------------------------|
| Minimum value            | 0.281                                                        | 0.070                                                           | 0.048                                        | 0.046                                        | 1.588                                             |
| 25th percentile<br>value | 2.688                                                        | 0.135                                                           | 0.057                                        | 0.054                                        | 2.847                                             |
| Median value             | 3.017                                                        | 0.218                                                           | 0.066                                        | 0.059                                        | 3.101                                             |
| 75th percentile<br>value | 3.230                                                        | 0.429                                                           | 0.084                                        | 0.065                                        | 3.355                                             |
| Maximum value            | 3.678                                                        | 1.623                                                           | 0.198                                        | 0.100                                        | 3.655                                             |
| Mean                     | 2.866                                                        | 0.400                                                           | 0.081                                        | 0.061                                        | 3.044                                             |
| SD                       | 0.553                                                        | 0.431                                                           | 0.039                                        | 0.012                                        | 0.484                                             |

**Supplementary Table S2.** The levels of anti-SARS-CoV-2 IgG subclasses in the participants.

| IgG subclass<br>(OD450) | Vaccines before pregnancy +<br>Infection<br>(Group I, n=101) | Vaccines before<br>pregnancy + no infection<br>(Group II, n=20) | No vaccines + infection<br>(Group III, n=17) | Before SARS-CoV-2 (2019)<br>(Group IV, n=20) | Adults Infection<br>SARS-CoV-2<br>(Group V, n=20) |
|-------------------------|--------------------------------------------------------------|-----------------------------------------------------------------|----------------------------------------------|----------------------------------------------|---------------------------------------------------|
| IgG1                    | 0.66 (0.32-1.07)                                             | 0.05 (0.05-0.06)                                                | 0.04 (0.04-0.05)                             | 0.04 (0.04-0.05)                             | 0.84 (0.6-1.22)                                   |
| IgG2                    | 0.06 (0.06-0.07)                                             | 0.04(0.04-0.05)                                                 | 0.05 (0.05-0.07)                             | 0.05 (0.05-0.07)                             | 0.04(0.04-0.05)                                   |
| IgG3                    | 0.05 (0.05-0.06)                                             | 0.05 (0.04-0.06)                                                | 0.04 (0.04-0.05)                             | 0.04 (0.04-0.05)                             | 0.05 (0.04-0.06)                                  |
| IgG4                    | 0.05 (0.04-0.05)                                             | 0.05 (0.05-0.06)                                                | 0.05 (0.04-0.06)                             | 0.05 (0.04-0.06)                             | 0.05 (0.05-0.06)                                  |

**Supplementary Table S3.** The descriptive statistical results of anti-SARS-CoV-2 IgG levels in infants born to mothers who received COVID-19 vaccination before pregnancy and experienced breakthrough infection, grouped based on the infants' age (<1 week, 1 month, and 2 months).

| IgG (OD <sub>450</sub> ) | <1 week (n=61) | 1-month (n=19) | 2-month (n=21) |
|--------------------------|----------------|----------------|----------------|
| Minimum value            | 1.348          | 2.342          | 0.281          |
| 25th percentile value    | 2.950          | 2.726          | 1.948          |
| Median value             | 3.164          | 2.895          | 2.293          |
| 75th percentile value    | 3.298          | 3.057          | 2.687          |
| Maximum value            | 3.678          | 3.281          | 3.161          |
| Mean                     | 3.083          | 2.882          | 2.219          |
| SD                       | 0.361          | 0.249          | 0.707          |

**Supplementary Table S4a.** The geometric mean titers (GMT) with 95% confidence interval (CI) of serum-neutralizing antibody in the participants.

| <b>Strain</b> | <b>Nab/Titer (OD<sub>50</sub>)</b> | <b>Vaccinated &amp;<br/>Infected mothers<br/>(Group I, n=101)</b> | <b>Uninfected mothers<br/>(Group II, n=20)</b> | <b>Unvaccinated mothers<br/>(Group III, n=17)</b> | <b>Pre-pandemic mothers<br/>(Group IV, n=20)</b> | <b>Adult convalescent<br/>(Group V, n=20)</b> |
|---------------|------------------------------------|-------------------------------------------------------------------|------------------------------------------------|---------------------------------------------------|--------------------------------------------------|-----------------------------------------------|
| <b>D614G</b>  | <b>GMT</b>                         | <b>463</b>                                                        | <b>19</b>                                      | <b>32</b>                                         | <b>9</b>                                         | <b>548</b>                                    |
|               | 95% CI. Lower                      | 376                                                               | 13                                             | 18                                                | 7                                                | 403                                           |
|               | 95% CI. Upper                      | 569                                                               | 27                                             | 58                                                | 13                                               | 746                                           |
| <b>Alpha</b>  | <b>GMT</b>                         | <b>511</b>                                                        | <b>16</b>                                      | <b>31</b>                                         | <b>9</b>                                         | <b>474</b>                                    |
|               | 95% CI. Lower                      | 412                                                               | 11                                             | 18                                                | 6                                                | 308                                           |
|               | 95% CI. Upper                      | 635                                                               | 25                                             | 53                                                | 12                                               | 732                                           |
| <b>Beta</b>   | <b>GMT</b>                         | <b>874</b>                                                        | <b>20</b>                                      | <b>21</b>                                         | <b>6</b>                                         | <b>705</b>                                    |
|               | 95% CI. Lower                      | 710                                                               | 13                                             | 12                                                | 5                                                | 456                                           |
|               | 95% CI. Upper                      | 1077                                                              | 31                                             | 37                                                | 8                                                | 1088                                          |
| <b>Delta</b>  | <b>GMT</b>                         | <b>129</b>                                                        | <b>22</b>                                      | <b>20</b>                                         | <b>9</b>                                         | <b>257</b>                                    |
|               | 95% CI. Lower                      | 99                                                                | 16                                             | 11                                                | 7                                                | 185                                           |
|               | 95% CI. Upper                      | 168                                                               | 31                                             | 37                                                | 11                                               | 357                                           |
| <b>BA.4/5</b> | <b>GMT</b>                         | <b>231</b>                                                        | <b>8</b>                                       | <b>12</b>                                         | <b>7</b>                                         | <b>231</b>                                    |
|               | 95% CI. Lower                      | 177                                                               | 6                                              | 8                                                 | 5                                                | 154                                           |
|               | 95% CI. Upper                      | 300                                                               | 12                                             | 17                                                | 10                                               | 346                                           |
| <b>BF.7</b>   | <b>GMT</b>                         | <b>220</b>                                                        | <b>16</b>                                      | <b>13</b>                                         | <b>6</b>                                         | <b>215</b>                                    |
|               | 95% CI. Lower                      | 168                                                               | 11                                             | 8                                                 | 5                                                | 145                                           |
|               | 95% CI. Upper                      | 288                                                               | 22                                             | 19                                                | 8                                                | 319                                           |

|              |               |           |           |           |          |           |
|--------------|---------------|-----------|-----------|-----------|----------|-----------|
| <b>XBB.1</b> | <b>GMT</b>    | <b>64</b> | <b>11</b> | <b>19</b> | <b>6</b> | <b>49</b> |
|              | 95% CI. Lower | 48        | 8         | 11        | 5        | 30        |
|              | 95% CI. Upper | 87        | 16        | 31        | 6        | 79        |

**Supplementary Table S4b.** The geometric mean ratio (GMR) with 95% CI of serum-neutralizing antibody in the participants.

| Comparison             | Values        | D614G | Alpha | Beta  | Delta | BA.4/5 | BF.7  | XBB.1 |
|------------------------|---------------|-------|-------|-------|-------|--------|-------|-------|
| Group II vs. Group IV  | GMR           | 2.11  | 1.78  | 3.33  | 2.44  | 1.14   | 2.67  | 1.83  |
|                        | 95% CI. Lower | 1.41  | 1.19  | 2.22  | 1.63  | 0.76   | 1.78  | 1.22  |
|                        | 95% CI. Upper | 3.16  | 2.66  | 5.00  | 3.66  | 1.71   | 4.00  | 2.75  |
| Group I vs. Group V    | GMR           | 0.84  | 1.08  | 1.24  | 0.50  | 1.00   | 1.02  | 1.31  |
|                        | 95% CI. Lower | 0.56  | 0.72  | 0.83  | 0.33  | 0.67   | 0.68  | 0.87  |
|                        | 95% CI. Upper | 1.27  | 1.62  | 1.86  | 0.75  | 1.50   | 1.53  | 1.96  |
| Group I vs. Group III  | GMR           | 14.47 | 16.48 | 41.62 | 6.45  | 19.25  | 16.92 | 3.37  |
|                        | 95% CI. Lower | 9.65  | 11.00 | 27.77 | 4.30  | 12.84  | 11.29 | 2.25  |
|                        | 95% CI. Upper | 21.69 | 24.71 | 62.39 | 9.67  | 28.86  | 25.37 | 5.05  |
| Group I vs. Group II   | GMR           | 24.37 | 31.94 | 43.70 | 5.86  | 28.88  | 13.75 | 5.82  |
|                        | 95% CI. Lower | 16.26 | 21.31 | 29.15 | 3.91  | 19.26  | 9.17  | 3.88  |
|                        | 95% CI. Upper | 36.53 | 47.87 | 65.51 | 8.79  | 43.28  | 20.61 | 8.72  |
| Group III vs. Group II | GMR           | 1.68  | 1.94  | 1.05  | 0.91  | 1.50   | 0.81  | 1.73  |
|                        | 95% CI. Lower | 1.12  | 1.29  | 0.70  | 0.61  | 1.00   | 0.54  | 1.15  |
|                        | 95% CI. Upper | 2.52  | 2.90  | 1.57  | 1.36  | 2.25   | 1.22  | 2.59  |

**Supplementary Table S5a.** The geometric mean titers (GMT) with 95% CI of serum-neutralizing antibody in infants grouped by the maternal doses of COVID-19 vaccination before pregnancy.

| Strain | Nab/Titer (OD <sub>50</sub> ) | Group II      |              | Group I       |               |
|--------|-------------------------------|---------------|--------------|---------------|---------------|
|        |                               | 2-dose (n=12) | 3-dose (n=8) | 2-dose (n=31) | 3-dose (n=66) |
| D614G  | <b>GMT</b>                    | <b>14</b>     | <b>28</b>    | <b>307</b>    | <b>573</b>    |
|        | 95% CI. Lower                 | 9             | 14           | 223           | 444           |
|        | 95% CI. Upper                 | 22            | 55           | 423           | 738           |
| Alpha  | <b>GMT</b>                    | <b>14</b>     | <b>22</b>    | <b>331</b>    | <b>649</b>    |
|        | 95% CI. Lower                 | 8             | 10           | 227           | 506           |
|        | 95% CI. Upper                 | 24            | 47           | 482           | 832           |
| Beta   | <b>GMT</b>                    | <b>13</b>     | <b>38</b>    | <b>623</b>    | <b>1054</b>   |
|        | 95% CI. Lower                 | 8             | 19           | 470           | 819           |
|        | 95% CI. Upper                 | 21            | 74           | 826           | 1358          |
| Delta  | <b>GMT</b>                    | <b>18</b>     | <b>31</b>    | <b>70</b>     | <b>171</b>    |
|        | 95% CI. Lower                 | 11            | 22           | 42            | 126           |
|        | 95% CI. Upper                 | 29            | 44           | 115           | 232           |
| BA.4/5 | <b>GMT</b>                    | <b>9</b>      | <b>8</b>     | <b>136</b>    | <b>297</b>    |
|        | 95% CI. Lower                 | 5             | 5            | 86            | 218           |
|        | 95% CI. Upper                 | 14            | 13           | 216           | 403           |
| BF.7   | <b>GMT</b>                    | <b>15</b>     | <b>17</b>    | <b>109</b>    | <b>297</b>    |
|        | 95% CI. Lower                 | 9             | 8            | 67            | 218           |
|        | 95% CI. Upper                 | 24            | 34           | 176           | 404           |
| XBB.1  | <b>GMT</b>                    | <b>12</b>     | <b>10</b>    | <b>30</b>     | <b>88</b>     |
|        | 95% CI. Lower                 | 7             | 6            | 18            | 62            |
|        | 95% CI. Upper                 | 20            | 17           | 51            | 126           |

**Supplementary Table S5b.** The geometric mean ratio (GMR) with 95% CI of serum-neutralizing antibody in infants grouped by the maternal doses of COVID-19 vaccination before pregnancy.

| Comparison                       | Values        | D614G | Alpha | Beta | Delta | BA.4/5 | BF.7 | XBB.1 |
|----------------------------------|---------------|-------|-------|------|-------|--------|------|-------|
| 3-dose vs. 2-dose<br>in Group II | GMR           | 2.00  | 1.57  | 2.92 | 1.72  | 0.89   | 1.13 | 0.83  |
|                                  | 95% CI. Lower | 1.33  | 1.05  | 1.95 | 1.15  | 0.59   | 0.76 | 0.56  |
|                                  | 95% CI. Upper | 3.00  | 2.36  | 4.38 | 2.58  | 1.33   | 1.70 | 1.25  |
| 3-dose vs. 2-dose<br>in Group I  | GMR           | 1.87  | 1.96  | 1.69 | 2.44  | 2.18   | 2.72 | 2.93  |
|                                  | 95% CI. Lower | 1.25  | 1.31  | 1.13 | 1.63  | 1.46   | 1.82 | 1.96  |
|                                  | 95% CI. Upper | 2.80  | 2.94  | 2.54 | 3.66  | 3.27   | 4.08 | 4.40  |

**Supplementary Table S6a.** The geometric mean titers (GMT) with 95% CI of serum-neutralizing antibody in infants born to mothers who received COVID-19 vaccination before pregnancy and experienced breakthrough infection, grouped based on the infants' age (<1 week, 1 month, and 2 months).

| Strain | Nab/Titer (OD <sub>50</sub> ) | <1 week (n=61) | 1 month (n=19) | 2 month (n=21) |
|--------|-------------------------------|----------------|----------------|----------------|
| D614G  | <b>GMT</b>                    | <b>578</b>     | <b>600</b>     | <b>192</b>     |
|        | 95% CI. Lower                 | 451            | 442            | 115            |
|        | 95% CI. Upper                 | 742            | 814            | 320            |
| Alpha  | <b>GMT</b>                    | <b>710</b>     | <b>543</b>     | <b>187</b>     |
|        | 95% CI. Lower                 | 559            | 375            | 107            |
|        | 95% CI. Upper                 | 901            | 786            | 326            |
| Beta   | <b>GMT</b>                    | <b>1149</b>    | <b>876</b>     | <b>394</b>     |
|        | 95% CI. Lower                 | 904            | 606            | 225            |
|        | 95% CI. Upper                 | 1461           | 1268           | 691            |
| Delta  | <b>GMT</b>                    | <b>191</b>     | <b>85</b>      | <b>61</b>      |
|        | 95% CI. Lower                 | 142            | 46             | 32             |
|        | 95% CI. Upper                 | 257            | 157            | 118            |
| BA.4/5 | <b>GMT</b>                    | <b>357</b>     | <b>217</b>     | <b>69</b>      |
|        | 95% CI. Lower                 | 266            | 129            | 37             |
|        | 95% CI. Upper                 | 477            | 368            | 127            |
| BF.7   | <b>GMT</b>                    | <b>306</b>     | <b>194</b>     | <b>95</b>      |
|        | 95% CI. Lower                 | 217            | 114            | 52             |
|        | 95% CI. Upper                 | 431            | 331            | 172            |



|       |               |           |           |           |
|-------|---------------|-----------|-----------|-----------|
| XBB.1 | <b>GMT</b>    | <b>86</b> | <b>44</b> | <b>40</b> |
|       | 95% CI. Lower | 58        | 23        | 20        |
|       | 95% CI. Upper | 127       | 83        | 79        |

**Supplementary Table S6b.** The geometric mean ratio (GMR) with 95% CI of serum-neutralizing antibody in infants born to mothers who received COVID-19 vaccination before pregnancy and experienced breakthrough infection, grouped based on the infants' age (<1 week, 1 month, and 2 months).

| Comparison        | Values        | D614G | Alpha | Beta | Delta | BA.4/5 | BF.7 | XBB.1 |
|-------------------|---------------|-------|-------|------|-------|--------|------|-------|
| 1month vs. <1week | GMR           | 1.04  | 0.76  | 0.76 | 0.45  | 0.61   | 0.63 | 0.51  |
|                   | 95% CI. Lower | 0.69  | 0.51  | 0.51 | 0.30  | 0.41   | 0.42 | 0.34  |
|                   | 95% CI. Upper | 1.56  | 1.15  | 1.14 | 0.67  | 0.91   | 0.95 | 0.77  |
| 2month vs. <1week | GMR           | 0.33  | 0.26  | 0.34 | 0.32  | 0.19   | 0.31 | 0.47  |
|                   | 95% CI. Lower | 0.22  | 0.18  | 0.23 | 0.21  | 0.13   | 0.21 | 0.31  |
|                   | 95% CI. Upper | 0.50  | 0.39  | 0.51 | 0.48  | 0.29   | 0.47 | 0.70  |

**Supplementary Table S7a.** The geometric mean titers (GMT) with 95% CI of serum-neutralizing antibody in infants aged up to 1 week born to the mothers infected at the second (n=19) or third trimester (n=42).

| Strain | Nab/Titer (OD <sub>50</sub> ) | Trimester with age<1 week in Group I |                        |
|--------|-------------------------------|--------------------------------------|------------------------|
|        |                               | Second trimester (n=19)              | Third trimester (n=42) |
| D614G  | <b>GMT</b>                    | <b>615</b>                           | <b>562</b>             |
|        | 95% CI. Lower                 | 365                                  | 420                    |
|        | 95% CI. Upper                 | 1037                                 | 751                    |
| Alpha  | <b>GMT</b>                    | <b>790</b>                           | <b>676</b>             |
|        | 95% CI. Lower                 | 491                                  | 509                    |
|        | 95% CI. Upper                 | 1273                                 | 898                    |
| Beta   | <b>GMT</b>                    | <b>1457</b>                          | <b>1032</b>            |
|        | 95% CI. Lower                 | 839                                  | 799                    |
|        | 95% CI. Upper                 | 2532                                 | 1332                   |
| Delta  | <b>GMT</b>                    | <b>226</b>                           | <b>177</b>             |
|        | 95% CI. Lower                 | 122                                  | 125                    |
|        | 95% CI. Upper                 | 418                                  | 250                    |
| BA.4/5 | <b>GMT</b>                    | <b>354</b>                           | <b>358</b>             |
|        | 95% CI. Lower                 | 172                                  | 265                    |
|        | 95% CI. Upper                 | 726                                  | 483                    |
| BF.7   | <b>GMT</b>                    | <b>337</b>                           | <b>292</b>             |
|        | 95% CI. Lower                 | 152                                  | 202                    |
|        | 95% CI. Upper                 | 748                                  | 424                    |
| XBB.1  | <b>GMT</b>                    | <b>103</b>                           | <b>79</b>              |

|               |     |     |
|---------------|-----|-----|
| 95% CI. Lower | 45  | 51  |
| 95% CI. Upper | 238 | 123 |

**Supplementary Table S7b.** The geometric mean ratio (GMR) with 95% CI of serum-neutralizing antibody in infants aged up to 1 week born to the mothers infected at the second (n=19) or third trimester (n=42).

| Comparison                                               | Values        | D614G | Alpha | Beta | Delta | BA.4/5 | BF.7 | XBB.1 |
|----------------------------------------------------------|---------------|-------|-------|------|-------|--------|------|-------|
| Third vs. Second Trimester<br>with age<1 week in Group I | GMR           | 0.91  | 0.86  | 0.71 | 0.78  | 1.01   | 0.87 | 0.77  |
|                                                          | 95% CI. Lower | 0.61  | 0.57  | 0.47 | 0.52  | 0.67   | 0.58 | 0.51  |
|                                                          | 95% CI. Upper | 1.37  | 1.28  | 1.06 | 1.17  | 1.52   | 1.30 | 1.15  |

**Supplementary Figure S1.** Comparison of SARS-CoV-2 IgG titers and serum-neutralized antibody against D614G, Alpha, Beta, Delta, BA.4/5, BF.7, and XBB.1 variants in infants grouped by the maternal doses of COVID-19 vaccination before pregnancy.

**A).** Comparison of SARS-CoV-2 IgG titers and serum-neutralized antibody against different variants in infants born to the mothers received 2- or 3-dose of vaccination before pregnancy and with no breakthrough infection during pregnancy.

**B).** Comparison of SARS-CoV-2 IgG titers and serum-neutralized antibody against different variants in infants born to the mothers received 2- or 3-dose of vaccination before pregnancy and with breakthrough infection during pregnancy.

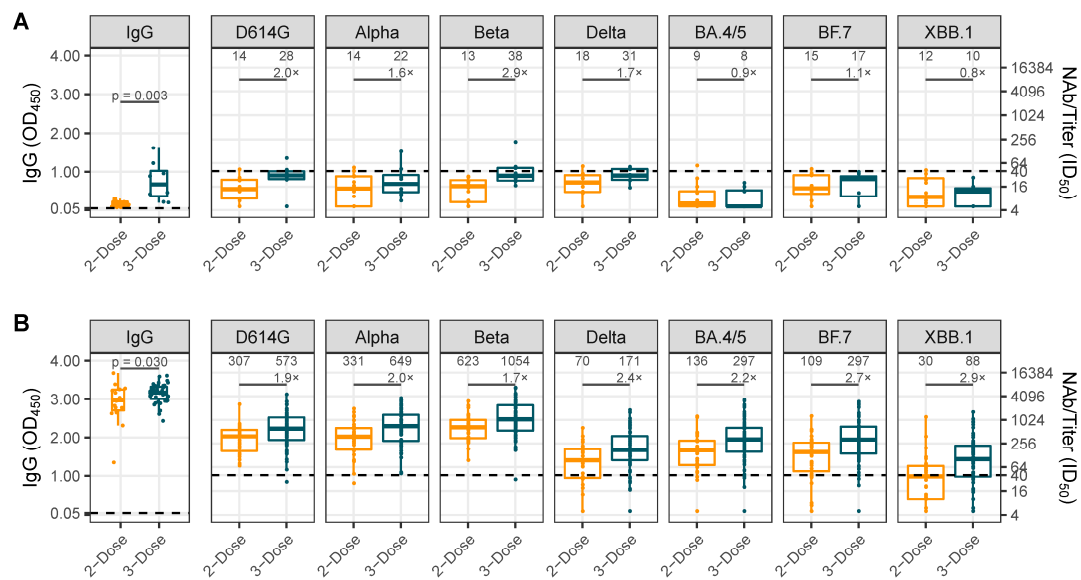

**Supplementary Figure S2.** The titers of SARS-CoV-2 IgG and serum-neutralized antibody against D614G, Alpha, Beta, Delta, BA.4/5, BF.7, and XBB.1 variants in infants aged up to 1 week born to the mothers infected at the second (n=19) or third trimester (n=42).

**A).** The distribution of SARS-CoV-2 IgG titers in infants with the time difference from maternal infection to delivery.

**B).** Comparison of SARS-CoV-2 IgG titers in infants born to the mothers infected at the second or third trimester.

**C).** Comparison of serum-neutralized antibody against D614G, Alpha, Beta, Delta, BA.4/5, BF.7, and XBB.1 variants in infants born to the mothers infected at the second or third trimester.

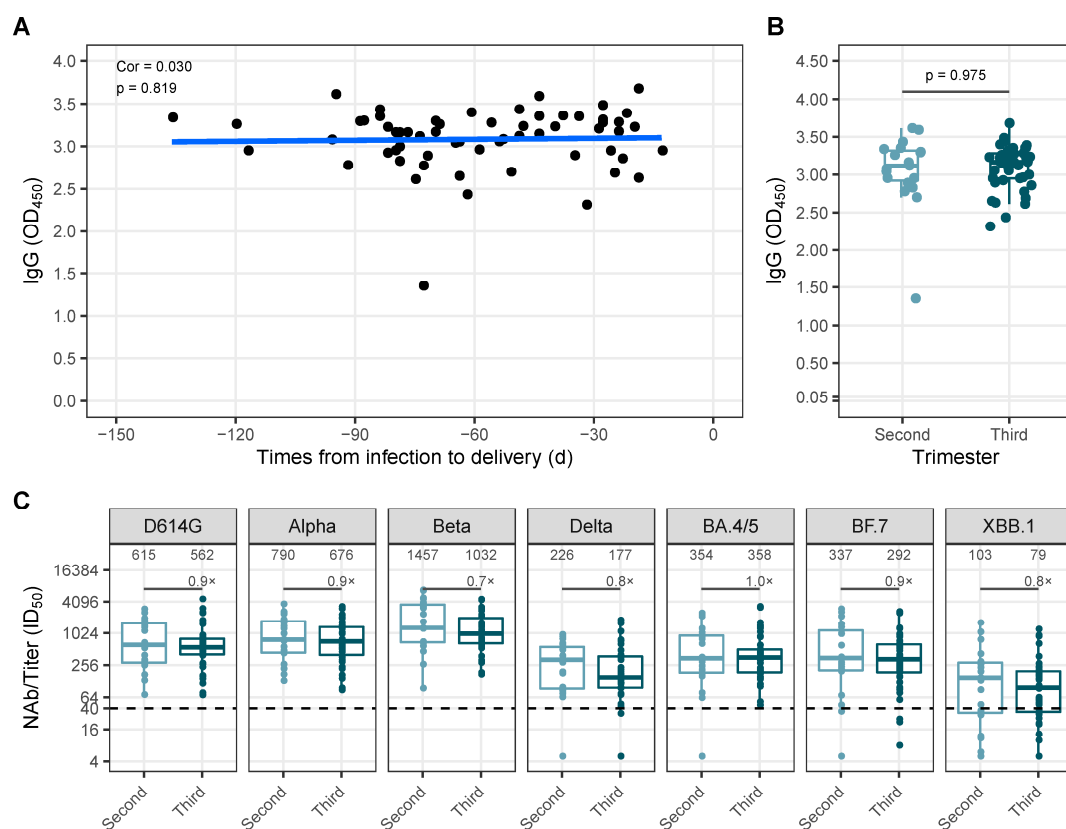

Supplement: s1 [file vaccines-3213160-supplementary.pdf › vaccines-3213160-supplementary.pdf]
